# Supplementary material for: Development of a stem taper equation and modelling the effect of stand density on taper for Chinese fir plantations in Southern China
Source: PeerJ. 2016 Apr 25;4:e1929. doi: 10.7717/peerj.1929 (PMC4860307; doi:10.7717/peerj.1929)
Supplement: Data S1 [file peerj-04-1929-s001.xls]

## Sheet: Tree data
									sharma-2			sharma			pain function			brink-2
	n	D1.3	QH	pd		D	H	Qd	R2	rss	SEE	R2	rss	SEE	R2	rss	SEE	R2	rss	SEE
A1	15	13.1	13.7	1667		19.4611	17.8469	19.7883	0.9976	0.584605	0.230534	0.9973	3.94717	0.530981	0.9764	5.55121	0.653465	0.9982	0.505822	0.205309
A2	17	16.7	15.5	1667	0.917053	19.4611	17.8469	19.7883	0.9947	2.29963	0.420589	0.9914	28.4345	1.3331	0.9437	23.3265	1.24704	0.9986	0.584198	0.204275		R2	SEE	R2	SEE	R2	SEE	R2	SEE
A3	20	18.6	18.7	1667	0.917053	19.4611	17.8469	19.7883	0.9978	1.37158	0.292787	0.9925	17.5481	0.961034	0.9692	21.4762	1.0923	0.9985	0.955839	0.23712		0.9364	0.0639194	0.9344	0.099867	0.9213	0.293633	0.9396	0.056943
A4	20	15.5	15.7	1667	0.863518	19.7617	17.0646	20.0765	0.9982	0.558769	0.186877	0.992	10.8706	0.756398	0.9399	18.6467	1.0178	0.9923	4.62419	0.521547		0.9996	0.830908	0.9987	1.43246	0.9894	1.44316	0.9991	1.45183
A5	17	13.5	13.6	1667	0.863518	19.7617	17.0646	20.0765	0.9843	3.50112	0.518957	0.9801	18.3364	1.07053	0.9539	14.806	0.993512	0.9923	1.81644	0.360202		0.995496	0.21583	0.992251	0.396211	0.966428	0.643476	0.989301	0.368271
B1	11	9.2	8.8	3333	1.02799	15.6283	16.0657	16.0648	0.9982	0.103209	0.121425	0.9961	1.24182	0.352394	0.968	9.66969	1.03654	0.9732	8.44452	1.02741
B2	12	8	11	3333	1.02799	15.6283	16.0657	16.0648	0.9986	0.0738386	0.096072	0.9985	0.109708	0.099867	0.969	1.75823	0.419313	0.9882	0.656932	0.270171		R2	0.9364	0.9996	0.995496		0.9344	0.9987	0.992251		0.9213	0.9894	0.966428		0.9396	0.9991	0.989301
B3	19	15.3	17.8	3333	1.02799	15.6283	16.0657	16.0648	0.9945	1.9469	0.360268	0.9945	6.05135	0.579816	0.9689	10.647	0.791389	0.9991	0.0518801	0.056943		SEE	0.0639194	0.830908	0.21583		0.099867	1.43246	0.396211		0.293633	1.44316	0.643476		0.056943	1.45183	0.368271
B4	18	15.8	16.8	3333	1.02799	15.6283	16.0657	16.0648	0.9865	4.79898	0.585478	0.9855	12.9922	0.874213	0.9426	20.1107	1.12112	0.981	1.85084	0.351268		R2
B5	14	10.1	12.2	3333	1.02799	15.6283	16.0657	16.0648	0.9986	0.193306	0.139034	0.9926	3.82445	0.542392	0.9505	6.63316	0.743481	0.9957	0.732624	0.258074		SEE
B6	16	13.2	14.6	3333	1.06135	16.0681	17.0538	16.5202	0.9989	0.215301	0.133947	0.9964	1.88688	0.354672	0.9486	10.4504	0.863976	0.9942	5.8645	0.671651		R2
B7	16	10.7	14.4	3333	1.06135	16.0681	17.0538	16.5202	0.9986	0.208441	0.131795	0.9984	0.286303	0.138155	0.9693	5.65755	0.635697	0.9833	3.00495	0.480781		SEE
B8	17	15.4	15.5	3333	1.06135	16.0681	17.0538	16.5202	0.9893	3.4308	0.513719	0.9886	3.752	0.484252	0.9694	9.68829	0.80367	0.9923	2.90629	0.455623		R2	0.9396	0.9991	0.989301
B9	16	13.7	14.3	3333		16.0681	17.0538	16.5202	0.9991	0.245027	0.142895	0.9936	6.20407	0.643121	0.9533	12.555	0.946989	0.9923	2.6517	0.451638		SEE	0.056943	1.45183	0.368271
B10	17	16.3	15.2	3333		16.0681	17.0538	16.5202	0.9972	1.26059	0.311398	0.9935	14.6814	0.957907	0.957	18.4009	1.10758	0.9961	1.90272	0.368658
B11	15	11	13.8	3333		16.0681	17.0538	16.5202	0.9978	0.322221	0.171151	0.9948	3.32511	0.487348	0.9539	6.76871	0.721575	0.9936	1.0423	0.294717		R2	SEE		R2	SEE		R2	SEE		R2	SEE
B12	17	17.1	15.3	3333		16.0681	17.0538	16.5202	0.9899	4.30041	0.575153	0.9902	5.83431	0.603858	0.9763	10.4166	0.833331	0.9927	3.17786	0.476434		0.9396	0.056943		0.9213	0.293633		0.9344	0.099867		0.9364	0.0639194
B13	14	12.7	12.5	3333		16.0681	17.0538	16.5202	0.998	0.416583	0.204104	0.9946	5.50938	0.650998	0.9595	8.38976	0.83615	0.9956	1.10419	0.316829		0.9991	1.45183		0.9894	1.44316		0.9987	1.43246		0.9996	0.830908
B14	16	13.3	14.6	3333		16.0681	17.0538	16.5202	0.9959	1.05489	0.296492	0.9915	4.38777	0.540849	0.9772	6.02589	0.656065	0.9954	1.31221	0.317709		0.989301	0.368271		0.966428	0.643476		0.992251	0.396211		0.995496	0.21583
B15	12	13	10.7	3333		16.0681	17.0538	16.5202	0.994	1.15233	0.379528	0.9905	8.16394	0.861496	0.9636	8.00236	0.894559	0.9965	0.676181	0.274101
B16	17	15.2	15.8	3333		16.0681	17.0538	16.5202	0.9971	0.908807	0.264402	0.9969	6.29645	0.627318	0.9667	10.334	0.830021	0.9954	1.62782	0.340989
B17	14	11.1	12.6	3333		16.0681	17.0538	16.5202	0.9985	0.238532	0.154445	0.9922	4.13193	0.563774	0.9552	7.01017	0.764317	0.9929	1.47485	0.366166							1160.77
B18	16	13.5	14.7	3333		16.0681	17.0538	16.5202	0.9932	1.56893	0.361586	0.9932	3.47308	0.481185	0.9782	4.79208	0.585057	0.9975	0.555447	0.206704							480.33
B19	15	13	13.8	3333		16.0681	17.0538	16.5202	0.9983	0.286087	0.16127	0.9982	0.389558	0.16681	0.9618	6.81878	0.724239	0.9913	1.55449	0.359917							1942
B20	15	11.1	13.7	3333		13.7479	13.286	14.1774	0.9986	0.201793	0.135443	0.9967	1.30233	0.304997	0.9663	4.93726	0.616271	0.9909	1.62235	0.36769							2422.33
B21	13	10.8	11.2	3333		13.7479	13.286	14.1774	0.9992	0.11424	0.112665	0.9982	0.299638	0.158019	0.9727	4.22263	0.619577	0.9899	1.87537	0.433055							1160.77
B22	13	8.8	11.5	3333		13.7479	13.286	14.1774	0.9992	0.0628325	0.0835547	0.9973	1.16595	0.311709	0.9807	2.90975	0.514318	0.9875	1.22639	0.350198							3583.1
B23	14	10.2	12.6	3333		13.7479	13.286	14.1774	0.9983	0.180003	0.134165	0.9979	0.277914	0.146212	0.9735	3.47042	0.537775	0.9927	0.847712	0.277605
B24	15	12.8	13.8	3333		13.7479	13.286	14.1774	0.9961	0.765746	0.263843	0.9951	5.94756	0.651787	0.9636	7.39157	0.754044	0.9977	0.464581	0.196761
B25	16	13.1	14.8	3333		13.7479	13.286	14.1774	0.9942	1.00119	0.288847	0.9914	1.60832	0.327446	0.9572	9.12636	0.807392	0.9978	0.460083	0.188125
B26	14	11.4	12.6	3333		13.7479	13.286	14.1774	0.9976	0.359291	0.18955	0.9975	1.02091	0.280235	0.979	3.06046	0.505013	0.9965	0.58048	0.229719
B27	15	12.7	13.5	3333		13.7479	13.286	14.1774	0.9953	0.930395	0.290829	0.9959	1.50064	0.327397	0.976	4.47737	0.586867	0.9982	0.358524	0.17285
B28	8	7.1	6.6	3333		13.7479	13.286	14.1774	0.9981	0.0753744	0.137272	0.995	0.774335	0.332595	0.9769	0.905631	0.388508	0.9936	0.287834	0.239931
B29	14	12.6	12.3	3333		13.7479	13.286	14.1774	0.9981	0.199739	0.141329	0.9909	2.45894	0.434913	0.9845	1.98996	0.407223	0.9942	0.649751	0.24304
B30	19	17.4	17.7	3333		13.7479	13.286	14.1774	0.9994	0.361158	0.155168	0.9839	35.6698	1.40771	0.946	35.4059	1.44316	0.9983	1.23216	0.277506
C1	9	6.7	7.2	5000		13.0426	14.5108	13.5292	0.9953	0.174973	0.187069	0.9946	0.335431	0.204765	0.9699	2.04483	0.54048	0.9775	1.87471	0.558974
C2	13	9.3	11.5	5000		13.0426	14.5108	13.5292	0.9976	0.181683	0.142081	0.9893	2.28131	0.436015	0.9544	7.05929	0.801095	0.9796	1.67587	0.409374
C3	13	8.5	11.4	5000		13.0426	14.5108	13.5292	0.9985	0.103018	0.106988	0.9942	0.753475	0.250578	0.9562	4.85287	0.664206	0.9841	1.26415	0.355548
C4	15	11.7	13.4	5000		13.0426	14.5108	13.5292	0.9973	0.437354	0.199398	0.9891	5.58877	0.631821	0.9835	6.25419	0.693608	0.9872	2.40967	0.448114
C5	13	9.7	11.8	5000		13.0426	14.5108	13.5292	0.995	0.45818	0.22563	0.9918	3.84005	0.565689	0.94	5.31309	0.694988	0.9991	0.0845993	0.0919779
C6	13	10.3	11.3	5000		13.0426	14.5108	13.5292	0.9976	0.296477	0.181499	0.9923	1.5287	0.35692	0.9572	7.07705	0.802103	0.9775	3.18188	0.564082
C7	14	10.4	12.4	5000		13.0426	14.5108	13.5292	0.9977	0.28737	0.16952	0.9953	1.01513	0.27944	0.9801	3.65225	0.551683	0.9921	1.07329	0.312365
C8	14	10.8	12.7	5000		13.0426	14.5108	13.5292	0.9935	0.932452	0.305361	0.9909	2.14391	0.406099	0.9836	2.68993	0.473456	0.9936	0.967261	0.296535
C9	12	9.3	10.8	5000		13.0426	14.5108	13.5292	0.9942	0.390251	0.220865	0.9908	0.827885	0.27434	0.9767	2.19411	0.468414	0.9985	0.104219	0.10761
C10	13	12.3	11.7	5000		13.0426	14.5108	13.5292	0.9959	0.75924	0.290448	0.9829	8.17056	0.825155	0.9725	6.78174	0.785189	0.9945	1.03872	0.322292
C11	13	12.2	11.6	5000		13.0426	14.5108	13.5292	0.9972	0.522027	0.240838	0.9934	3.20265	0.516612	0.9737	5.03927	0.676843	0.9969	0.648792	0.254714
C12	16	14.3	14.4	5000		13.0426	14.5108	13.5292	0.9964	0.810994	0.259967	0.9869	8.07002	0.733486	0.9777	11.4309	0.903601	0.9926	1.99499	0.39174
C13	16	12.4	14.8	5000		13.0426	14.5108	13.5292	0.9844	2.91632	0.492977	0.9833	4.03528	0.51867	0.9763	4.24894	0.550905	0.9968	0.592635	0.213512
C14	14	11	12.7	5000		13.0426	14.5108	13.5292	0.9858	2.12102	0.460546	0.9798	3.81348	0.541613	0.9825	2.68472	0.472998	0.9902	1.44666	0.36265
C15	12	10.6	10.6	5000		13.0426	14.5108	13.5292	0.9924	0.916143	0.338405	0.9921	1.99792	0.42618	0.9589	4.87005	0.697858	0.993	0.883679	0.313347
C16	16	11.3	14.6	5000		13.0426	14.5108	13.5292	0.999	0.136759	0.106755	0.995	1.16081	0.278185	0.9518	8.7708	0.791509	0.9879	1.81875	0.374038
C17	16	13.4	14.8	5000		13.0426	14.5108	13.5292	0.995	0.976392	0.285247	0.9909	2.18442	0.381613	0.9803	5.37096	0.619387	0.9956	0.889955	0.261645
C18	15	10.3	13.8	5000		13.0426	14.5108	13.5292	0.9978	0.259049	0.15346	0.9941	0.847227	0.246	0.9543	6.79865	0.723169	0.9756	3.08437	0.506982
C19	17	11.6	15.5	5000		13.0426	14.5108	13.5292	0.9749	4.03694	0.557255	0.9717	4.72681	0.543531	0.9457	10.9291	0.853583	0.9732	4.40104	0.560678
C20	13	9.3	11.6	5000		14.6522	15.9684	15.0464	0.999	0.0611484	0.0824274	0.9952	0.410192	0.184886	0.9811	1.21713	0.332638	0.9927	0.594949	0.243916
C21	17	12.7	15.4	5000		14.6522	15.9684	15.0464	0.9984	0.393873	0.174063	0.9978	0.78162	0.221023	0.9818	4.96768	0.575481	0.9904	2.80224	0.447392
C22	17	14.1	15.7	5000		14.6522	15.9684	15.0464	0.9987	0.302222	0.152472	0.9984	0.406866	0.159465	0.9754	7.32537	0.698826	0.9897	2.81777	0.44863
C23	17	14.3	15.2	5000		14.6522	15.9684	15.0464	0.9984	0.438348	0.183627	0.9968	1.59412	0.315646	0.959	12.2832	0.904921	0.9943	1.97833	0.375911
C24	14	10.8	12.8	5000		14.6522	15.9684	15.0464	0.9968	0.39646	0.199113	0.9958	1.90491	0.382794	0.9551	5.39565	0.67055	0.9947	0.756031	0.262164
C25	18	15.2	16.8	5000		14.6522	15.9684	15.0464	0.9935	2.11695	0.388858	0.9923	4.29016	0.502357	0.98	6.22558	0.623778	0.9963	1.15388	0.277355
C26	16	14	14.1	5000		14.6522	15.9684	15.0464	0.9986	0.322649	0.163974	0.9952	2.67662	0.422423	0.9559	16.4129	1.08275	0.9869	6.55656	0.710176
C27	15	9.8	13.7	5000		14.6522	15.9684	15.0464	0.9941	0.506737	0.214632	0.9887	1.58258	0.336216	0.968	4.52931	0.590261	0.995	0.460061	0.195802
C28	14	10	12.4	5000		14.6522	15.9684	15.0464	0.9983	0.20324	0.142562	0.9973	0.446177	0.18526	0.9725	3.62361	0.549516	0.988	1.85875	0.411068
C29	18	13.2	16.5	5000		14.6522	15.9684	15.0464	0.9969	0.767146	0.234086	0.9969	2.53466	0.386132	0.9657	8.38958	0.724119	0.994	1.65405	0.332069
C30	18	14.6	16.2	5000		14.6522	15.9684	15.0464	0.9965	1.11663	0.282416	0.9949	2.86791	0.410732	0.9799	8.27769	0.719274	0.9918	2.95124	0.443564
C31	16	12.2	14.7	5000		14.6522	15.9684	15.0464	0.9984	0.29459	0.156682	0.9959	2.45867	0.404859	0.9549	8.65321	0.786185	0.9886	2.35378	0.425512
C32	16	11.7	14.1	5000		14.6522	15.9684	15.0464	0.9972	0.530962	0.210349	0.9971	0.550859	0.191635	0.979	4.8386	0.58789	0.9928	1.69532	0.361122
C33	20	19.9	18.6	5000		14.6522	15.9684	15.0464	0.9963	2.29618	0.378829	0.995	7.39783	0.623987	0.9713	17.4743	0.98529	0.9936	4.59987	0.520174
C34	13	8.9	11.5	5000		12.9855	14.225	13.434	0.9965	0.32696	0.190602	0.9952	0.937591	0.279522	0.962	3.56912	0.569618	0.9906	0.970107	0.311465
C35	14	10.1	12.7	5000		12.9855	14.225	13.434	0.9975	0.288828	0.169949	0.9959	0.589559	0.212957	0.9832	2.08457	0.41679	0.9965	0.493236	0.211754
C36	14	9.9	12.3	5000		12.9855	14.225	13.434	0.9925	0.827968	0.287744	0.9914	1.00888	0.278579	0.9686	4.61849	0.620383	0.9881	1.47157	0.365758
C37	12	8.3	10.3	5000		12.9855	14.225	13.434	0.9992	0.0670736	0.0915653	0.9979	0.699161	0.252111	0.9836	2.28237	0.477742	0.9875	1.2306	0.369774
C38	12	8.8	10.4	5000		12.9855	14.225	13.434	0.9991	0.0992785	0.111399	0.9881	4.4067	0.632937	0.9523	5.0895	0.713408	0.9956	0.554075	0.248121
C39	13	8.6	11.5	5000		12.9855	14.225	13.434	0.994	0.465252	0.227365	0.9934	0.543152	0.21275	0.9639	3.39421	0.555486	0.9809	1.60385	0.400481
C40	14	9.5	12.7	5000		12.9855	14.225	13.434	0.9364	6.90408	0.830908	0.9344	7.11406	0.739754	0.927	8.23307	0.828305	0.9396	6.58415	0.773666
C41	16	10.8	14.9	5000		12.9855	14.225	13.434	0.9881	1.4697	0.349964	0.9878	1.95888	0.361375	0.9494	6.57169	0.685133	0.9873	2.23527	0.414661
C42	14	10.8	12.6	5000		12.9855	14.225	13.434	0.9988	0.167133	0.12928	0.9948	5.85147	0.670905	0.9501	6.97185	0.762225	0.9957	0.648989	0.242897
C43	10	6.1	8.4	5000		12.9855	14.225	13.434	0.9941	0.150225	0.158233	0.9915	0.629124	0.264391	0.973	1.2369	0.393207	0.9915	0.246786	0.187764
C44	14	13.2	12.6	5000		12.9855	14.225	13.434	0.9963	0.696216	0.263859	0.9959	2.64792	0.451316	0.961	7.30903	0.78044	0.9947	1.09454	0.315441
C45	12	10.6	10.2	5000		12.9855	14.225	13.434	0.993	0.817992	0.319764	0.9878	1.66083	0.388567	0.9437	7.2855	0.853551	0.9799	3.08701	0.585663
C46	12	9.8	10.8	5000		12.9855	14.225	13.434	0.9974	0.242076	0.173952	0.9974	3.14372	0.534596	0.9655	3.29644	0.574146	0.9986	0.140689	0.125029
C47	10	6.7	8.5	5000		12.9855	14.225	13.434	0.9975	0.088956	0.121762	0.9971	0.237159	0.16233	0.9789	1.21478	0.389677	0.9832	0.662195	0.30757
C48	14	9.3	12.6	5000		12.9855	14.225	13.434	0.9982	0.123722	0.11123	0.9948	1.27734	0.313459	0.9519	6.37431	0.72883	0.9824	2.21313	0.448546
D1	10	6.5	8.3	6667		11.9781	12.8962	12.4485	0.9962	0.109604	0.135157	0.9907	1.62239	0.424577	0.9666	2.64053	0.574514	0.9904	0.432077	0.248446
D2	13	8.6	11.9	6667		11.9781	12.8962	12.4485	0.9972	0.179439	0.141201	0.9967	0.929725	0.278347	0.9672	2.9746	0.520018	0.9872	0.928427	0.304701
D3	13	8.6	11.5	6667		11.9781	12.8962	12.4485	0.9979	0.143413	0.126233	0.995	0.973344	0.284802	0.9784	2.80761	0.50521	0.988	0.914422	0.302394
D4	13	8.1	11.3	6667		11.9781	12.8962	12.4485	0.9969	0.213974	0.154191	0.9905	1.00487	0.289377	0.9444	5.63092	0.715473	0.9743	2.1191	0.460336
D5	13	9.6	11.7	6667		11.9781	12.8962	12.4485	0.9973	0.244989	0.164988	0.992	1.57942	0.362793	0.9873	1.62016	0.38378	0.9922	0.775547	0.278486
D6	12	9.3	10.8	6667		11.9781	12.8962	12.4485	0.9961	0.354553	0.210521	0.9933	0.707378	0.253588	0.9877	1.12204	0.334969	0.9951	0.471011	0.228767
D7	16	11.6	14.6	6667		11.9781	12.8962	12.4485	0.9977	0.388185	0.179858	0.9971	0.758896	0.224929	0.9787	3.61536	0.508173	0.9943	1.05654	0.285082
D8	14	7.8	12.5	6667		11.9781	12.8962	12.4485	0.9908	0.543717	0.233177	0.9762	3.0841	0.487071	0.978	2.59156	0.464718	0.9917	0.49179	0.211443
D9	13	12.4	11.6	6667		11.9781	12.8962	12.4485	0.9975	0.563126	0.250139	0.9881	10.7903	0.948258	0.9646	9.35837	0.922367	0.9973	0.617792	0.248554
D10	12	10.2	10.7	6667		11.9781	12.8962	12.4485	0.9982	0.214126	0.163602	0.9831	5.15447	0.684535	0.9754	4.15696	0.644745	0.9957	0.581265	0.254136
D11	12	10	10.6	6667		11.9781	12.8962	12.4485	0.999	0.114954	0.119872	0.9937	6.45733	0.766179	0.9512	6.1638	0.785099	0.9983	0.224004	0.157764
D12	12	8.7	10.2	6667		11.9781	12.8962	12.4485	0.9987	0.133004	0.12894	0.996	0.948247	0.293606	0.9734	2.84348	0.533243	0.9943	0.855812	0.308367
D13	11	9.2	9.4	6667		11.9781	12.8962	12.4485	0.9993	0.0664097	0.0974018	0.9901	1.3538	0.367941	0.9883	1.11947	0.352684	0.9956	0.549717	0.262135
D14	12	10.6	10.9	6667		11.9781	12.8962	12.4485	0.9992	0.110031	0.117277	0.995	2.03259	0.429861	0.9786	2.89199	0.537772	0.9962	0.630054	0.264587
D15	15	13.7	13.6	6667		11.9781	12.8962	12.4485	0.9984	0.354701	0.17957	0.9983	1.67013	0.345391	0.9737	5.48968	0.649833	0.9972	0.648713	0.232507
D16	16	13.1	14.4	6667		11.9781	12.8962	12.4485	0.9975	0.541305	0.212388	0.9914	4.52381	0.54917	0.9446	12.7363	0.9538	0.9858	3.66044	0.530634
D17	14	11.1	12.2	6667		11.9781	12.8962	12.4485	0.9982	0.238177	0.15433	0.9941	1.15042	0.297479	0.9622	7.67217	0.799592	0.9904	1.44911	0.362957
D18	16	14.3	14.6	6667		12.8711	14.4294	13.4227	0.9953	1.22033	0.318895	0.9943	3.7371	0.49914	0.974	6.52966	0.682938	0.997	0.809823	0.249588
D19	13	10.6	11.4	6667		12.8711	14.4294	13.4227	0.9927	0.784996	0.295333	0.9838	2.55669	0.461581	0.9765	4.57325	0.644786	0.995	0.530816	0.230394
D20	13	7.7	11.5	6667		12.8711	14.4294	13.4227	0.9987	0.0801349	0.0943604	0.997	0.225356	0.137039	0.9583	2.91636	0.514902	0.9854	1.01059	0.317898
D21	16	13.5	14.3	6667		12.8711	14.4294	13.4227	0.9896	2.49249	0.45575	0.9871	3.06702	0.452182	0.9665	8.61331	0.78437	0.9988	0.254952	0.140042
D22	16	11.1	14.7	6667		12.8711	14.4294	13.4227	0.9957	0.626003	0.228401	0.9933	1.10144	0.270979	0.9823	3.24546	0.481475	0.9933	1.07658	0.287774
D23	14	9.6	12.6	6667		12.8711	14.4294	13.4227	0.9946	0.584118	0.241685	0.9946	0.722931	0.235818	0.9665	4.84825	0.635626	0.9757	3.1742	0.537181
D24	13	10.8	11.8	6667		12.8711	14.4294	13.4227	0.997	0.288299	0.178978	0.9907	1.79015	0.386237	0.9814	3.17365	0.537135	0.9947	0.516779	0.227328
D25	13	9.7	11.8	6667		12.8711	14.4294	13.4227	0.9967	0.334838	0.192884	0.9889	1.71137	0.377643	0.9374	6.40601	0.763128	0.9775	2.54145	0.504128
D26	16	11.7	14.7	6667		12.8711	14.4294	13.4227	0.9993	0.11443	0.0976518	0.9904	4.11888	0.524016	0.9321	11.0916	0.890089	0.9762	7.05933	0.736903
D27	15	10.2	13.5	6667		12.8711	14.4294	13.4227	0.9967	0.378152	0.185412	0.9959	0.722482	0.227169	0.96	4.79222	0.607151	0.9907	1.21444	0.318125
D28	15	12.3	13.7	6667		12.8711	14.4294	13.4227	0.995	1.10945	0.317583	0.9951	5.12651	0.605128	0.9712	6.32765	0.697669	0.9988	0.280268	0.152826
D29	16	11.6	14.7	6667		12.8711	14.4294	13.4227	0.9957	0.744846	0.24914	0.9965	1.86796	0.352889	0.9727	4.49914	0.566892	0.9958	0.736444	0.238012
D30	16	11.9	14.5	6667		12.8711	14.4294	13.4227	0.9986	0.258338	0.146725	0.9965	1.75065	0.341629	0.972	5.11714	0.604574	0.9945	1.32936	0.319779
D31	16	12.2	14.6	6667		12.8711	14.4294	13.4227	0.9972	0.535929	0.211331	0.9953	1.5617	0.322666	0.9818	4.14603	0.544192	0.991	1.8093	0.373064
D32	11	8.1	9.9	6667		12.8711	14.4294	13.4227	0.9992	0.0335819	0.0692634	0.9987	0.312604	0.176806	0.9688	2.02908	0.474819	0.987	0.591321	0.271873
D33	13	10.3	11.9	6667		12.8711	14.4294	13.4227	0.9984	0.143072	0.126083	0.9973	0.298796	0.157796	0.9737	2.52871	0.479461	0.9914	0.84273	0.290298
D34	15	12.6	13.2	6667		12.8711	14.4294	13.4227	0.9905	1.73893	0.397599	0.9893	3.22453	0.479921	0.9771	7.8489	0.777021	0.9827	4.20406	0.591894
D35	13	10.5	11.8	6667		12.8711	14.4294	13.4227	0.9972	0.278627	0.175951	0.9964	0.56389	0.216774	0.9751	2.79194	0.503798	0.9941	0.686799	0.262068
D36	13	9.5	11.4	6667		12.8711	14.4294	13.4227	0.9911	0.694972	0.277883	0.9914	0.772904	0.253789	0.9486	5.41935	0.701903	0.9727	2.91598	0.539999
D37	16	13.5	14.6	6667		12.8711	14.4294	13.4227	0.9983	0.354919	0.171978	0.9978	0.618978	0.203138	0.9769	6.04276	0.656982	0.9905	2.46208	0.43519
D38	14	13	12.8	6667		12.8711	14.4294	13.4227	0.9921	1.36307	0.369198	0.9899	2.30633	0.421201	0.9794	3.42722	0.534417	0.9957	0.727334	0.25714
D39	15	11.2	13.5	6667		12.8711	14.4294	13.4227	0.9937	0.948474	0.293641	0.9904	1.91127	0.369485	0.9847	2.21681	0.412945	0.997	0.436932	0.190817
D40	14	10.4	12.2	6667		12.6207	13.0296	13.1707	0.9983	0.210027	0.144923	0.996	0.594338	0.213818	0.9605	6.48795	0.735298	0.987	2.04793	0.431481
D41	12	8.7	10.5	6667		12.6207	13.0296	13.1707	0.9996	0.0351557	0.0662907	0.9966	0.904875	0.286812	0.9803	1.83186	0.428002	0.9965	0.441209	0.221412
D42	13	8.9	11.4	6667		12.6207	13.0296	13.1707	0.9957	0.427728	0.218003	0.9875	2.60092	0.465557	0.9692	3.13968	0.534252	0.9769	2.45	0.494975
D43	13	10.7	11.5	6667		12.6207	13.0296	13.1707	0.9938	0.849071	0.30715	0.9944	2.62721	0.467904	0.9759	3.22594	0.541541	0.998	0.277054	0.166449
D44	11	7.2	9.8	6667		12.6207	13.0296	13.1707	0.9968	0.21332	0.174569	0.9842	4.5201	0.672317	0.9449	4.02034	0.668359	0.9944	0.422998	0.229945
D45	10	5.8	8.4	6667		12.6207	13.0296	13.1707	0.9979	0.0604395	0.100366	0.9954	0.141607	0.125436	0.959	1.54182	0.439007	0.9877	0.435393	0.249397
D46	11	7.2	9.8	6667		12.6207	13.0296	13.1707	0.9924	0.346027	0.222334	0.9868	0.875726	0.295927	0.9856	0.831736	0.303998	0.9926	0.331814	0.203659
D47	11	8.2	8.5	6667		12.6207	13.0296	13.1707	0.988	0.472212	0.259728	0.9923	2.73438	0.522913	0.9623	16.097	1.33737	0.982	16.8626	1.45183
D48	13	8.6	11.7	6667		12.6207	13.0296	13.1707	0.9983	0.12649	0.118552	0.9978	0.311312	0.161067	0.9763	1.80968	0.405606	0.9944	0.473549	0.217612
D49	15	12.4	13.6	6667		12.6207	13.0296	13.1707	0.9938	1.08011	0.313355	0.9918	1.94342	0.37258	0.9685	5.66767	0.660284	0.9856	2.9429	0.495219
D50	15	13.4	13.8	6667		12.6207	13.0296	13.1707	0.9942	1.20001	0.33029	0.9939	2.03681	0.381427	0.9731	5.43703	0.64671	0.9945	1.20753	0.317218
D51	14	11.8	12.8	6667		12.6207	13.0296	13.1707	0.9967	0.495937	0.222696	0.9957	1.16904	0.299876	0.9677	4.91052	0.639695	0.9938	1.09047	0.314855
D52	15	11.7	13.3	6667		12.6207	13.0296	13.1707	0.9938	1.09357	0.315302	0.987	9.91615	0.841604	0.9353	11.0137	0.920438	0.9807	5.64152	0.685658
D53	8	5.8	6.5	6667		12.6207	13.0296	13.1707	0.9991	0.0163427	0.0639194	0.9983	0.351849	0.224197	0.9798	0.975511	0.403218	0.9914	0.169877	0.184324
D54	13	8.3	11.6	6667		12.6207	13.0296	13.1707	0.9979	0.136354	0.123087	0.9977	0.318833	0.163001	0.9626	3.09526	0.530459	0.9804	1.50392	0.387804
E1	15	10.2	13.1	10000		11.7202	13.725	12.1666	0.9865	1.68781	0.391711	0.9917	4.78916	0.584878	0.9631	11.3327	0.933674	0.9842	14.3575	1.09383
E2	13	7.5	11.8	10000		11.7202	13.725	12.1666	0.9868	0.644783	0.267661	0.9829	0.910227	0.275413	0.9638	2.25532	0.452801	0.9978	0.103562	0.101765
E3	13	8.4	11.7	10000		11.7202	13.725	12.1666	0.9987	0.0963875	0.103488	0.9924	0.816316	0.260819	0.9874	1.014	0.303614	0.9944	0.558391	0.236303
E4	14	10.4	12.6	10000		11.7202	13.725	12.1666	0.9895	1.09172	0.330412	0.9825	2.84951	0.468181	0.9355	9.01037	0.866524	0.9837	2.17051	0.444206
E5	14	8.3	12.5	10000		11.7202	13.725	12.1666	0.9976	0.129502	0.113799	0.9831	2.16583	0.408169	0.9358	7.08593	0.768436	0.9865	0.74853	0.26086
E6	12	8	10.4	10000		11.7202	13.725	12.1666	0.9926	0.410711	0.226581	0.9932	2.95268	0.518098	0.9562	5.65153	0.751766	0.9624	2.4412	0.520811
E7	16	12.6	14.6	10000		11.7202	13.725	12.1666	0.9896	1.92088	0.400091	0.9746	7.345	0.699762	0.9894	2.43086	0.416693	0.9948	0.938763	0.268724
E8	13	8.7	11.7	10000		11.7202	13.725	12.1666	0.9978	0.172319	0.138371	0.9974	0.268514	0.149587	0.9751	2.08441	0.435306	0.9926	0.672416	0.25931
E9	13	9	11.4	10000		11.7202	13.725	12.1666	0.9984	0.13478	0.122375	0.9923	1.82606	0.390092	0.9483	4.89807	0.667293	0.9818	4.18066	0.64658
E10	11	8.4	9.4	10000		11.7202	13.725	12.1666	0.9986	0.0916527	0.114426	0.9888	0.903484	0.30058	0.9404	4.64454	0.718373	0.9702	3.55095	0.666235
E11	10	5.7	8.2	10000		11.7202	13.725	12.1666	0.9945	0.188078	0.177049	0.9912	0.552904	0.247858	0.9834	0.863946	0.328623	0.9854	0.717847	0.320234
E12	14	11.7	13.5	10000		11.7202	13.725	12.1666	0.9934	1.0365	0.321947	0.9894	5.04246	0.622801	0.9672	6.16236	0.71661	0.9939	0.981864	0.298765
E13	14	8.5	12.7	10000		11.7202	13.725	12.1666	0.9972	0.187915	0.137082	0.9964	0.335503	0.160648	0.9545	3.3964	0.532009	0.9821	2.53586	0.480138
E14	14	8.8	12.1	10000		11.7202	13.725	12.1666	0.9944	0.456386	0.213632	0.9917	3.77477	0.538857	0.9748	5.42164	0.672163	0.9769	3.1165	0.532276
E15	14	9.8	12.6	10000		11.7202	13.725	12.1666	0.9971	0.350313	0.187166	0.9958	0.962887	0.272155	0.9704	3.58274	0.546408	0.9937	0.925982	0.290138
E16	14	9.1	12.8	10000		11.7202	13.725	12.1666	0.9968	0.26321	0.162237	0.9967	0.268079	0.143602	0.9671	2.94825	0.495669	0.9934	0.594392	0.232456
E17	9	6.5	7.6	10000		11.7202	13.725	12.1666	0.9975	0.0914403	0.135233	0.9936	0.731047	0.302293	0.9705	1.1151	0.399124	0.9931	0.296424	0.22227
E18	17	12.4	15.4	10000		11.7202	13.725	12.1666	0.9948	1.07757	0.287907	0.9918	1.8396	0.33908	0.985	3.68504	0.495651	0.994	1.43659	0.320334
E19	14	8.4	12.8	10000		11.7202	13.725	12.1666	0.997	0.18337	0.135414	0.9965	0.446262	0.185278	0.9581	3.56732	0.545231	0.9796	1.41941	0.359217
E20	11	7.2	9.3	10000		11.7202	13.725	12.1666	0.9991	0.0355968	0.0713109	0.9971	0.489273	0.221195	0.9682	2.47462	0.524364	0.9813	1.5624	0.441927
E21	13	9.8	11.6	10000		11.7202	13.725	12.1666	0.9991	0.0789824	0.0936793	0.9921	1.33747	0.33385	0.9433	6.17288	0.749113	0.9689	5.84517	0.764537
E22	14	11.3	12.5	10000		11.7202	13.725	12.1666	0.9953	0.512252	0.22633	0.992	2.2995	0.420577	0.9432	7.56302	0.793884	0.9816	7.87252	0.845981
E23	14	9.6	12.7	10000		11.7202	13.725	12.1666	0.998	0.183991	0.135643	0.9944	0.717916	0.234999	0.9786	2.0605	0.414377	0.9916	0.949272	0.293764
E24	11	7.3	9.9	10000		11.7202	13.725	12.1666	0.9967	0.131858	0.137247	0.9949	0.483274	0.219835	0.9788	1.25245	0.373043	0.9874	0.541554	0.260181
E25	15	11.3	13.7	10000		11.7202	13.725	12.1666	0.9971	0.418454	0.195042	0.9951	1.40212	0.316467	0.975	3.5743	0.524353	0.994	0.985013	0.286504
E26	14	11.5	12.8	10000		11.7202	13.725	12.1666	0.9939	0.857959	0.292909	0.9904	1.68738	0.360275	0.9847	2.06976	0.415307	0.998	0.278591	0.159143
E27	13	10.3	11.7	10000		11.7202	13.725	12.1666	0.9984	0.141333	0.125314	0.9979	0.187585	0.125028	0.957	4.53225	0.64189	0.9777	3.32318	0.57647
E28	14	8.3	12.3	10000		11.7202	13.725	12.1666	0.9984	0.139625	0.118163	0.9953	1.67893	0.359373	0.9631	3.2693	0.521959	0.9929	0.802957	0.270178
E29	16	11.5	14.8	10000		11.7202	13.725	12.1666	0.9989	0.170349	0.119146	0.9982	0.468529	0.176735	0.9619	6.37572	0.67484	0.9851	2.60512	0.447653
E30	11	8.5	9.6	10000		13.7989	15.2263	14.4175	0.9982	0.146423	0.144629	0.99	1.71355	0.41395	0.9694	2.571	0.534478	0.9939	0.580538	0.269383
E31	9	6.9	7.7	10000		13.7989	15.2263	14.4175	0.993	0.210589	0.205226	0.9928	0.229258	0.169284	0.97	1.06744	0.390502	0.9922	0.241813	0.200754
E32	14	9.7	12.7	10000		13.7989	15.2263	14.4175	0.9981	0.183848	0.135591	0.9964	1.10951	0.292142	0.9541	4.54249	0.615257	0.9917	0.903176	0.286543
E33	14	11.3	12.5	10000		13.7989	15.2263	14.4175	0.9981	0.245453	0.156669	0.9981	0.4533	0.186733	0.9677	5.27176	0.662807	0.9948	5.85832	0.729777
E34	14	12.9	12.5	10000		13.7989	15.2263	14.4175	0.997	0.644431	0.253856	0.9822	26.6753	1.43246	0.9213	17.4349	1.20537	0.9899	4.56572	0.644256
E35	16	12.1	14.8	10000		13.7989	15.2263	14.4175	0.9977	0.356534	0.172369	0.9973	0.428694	0.169055	0.9727	5.25432	0.612624	0.9894	1.84354	0.376578
E36	11	7.7	9.4	10000		13.7989	15.2263	14.4175	0.9982	0.0801445	0.107001	0.9971	0.859553	0.293181	0.9758	2.487	0.525674	0.9776	1.92044	0.489955
E37	8	5.5	6.6	10000		12.8662	15.2333	13.5367	0.9944	0.0791472	0.140666	0.9927	0.196011	0.167337	0.9633	0.938295	0.395452	0.989	0.341723	0.261428
E38	16	13.3	14.8	10000		12.8662	15.2333	13.5367	0.9974	0.47867	0.199723	0.9974	0.864314	0.240044	0.9613	7.69794	0.741521	0.9836	6.59829	0.712433
E39	17	15.1	15.6	10000		12.8662	15.2333	13.5367	0.9935	2.54481	0.442441	0.9931	7.4843	0.683936	0.9728	10.5795	0.839822	0.9928	3.13216	0.472997
E40	13	8.8	11.8	10000		12.8662	15.2333	13.5367	0.9968	0.176959	0.140222	0.9907	1.94493	0.402588	0.9579	4.78305	0.659411	0.9566	4.10715	0.64087
E41	14	10.4	12.9	10000		12.8662	15.2333	13.5367	0.9994	0.0851196	0.0922603	0.9911	6.15364	0.688009	0.9527	7.51988	0.791616	0.9955	0.84046	0.276415
E42	14	9.6	12.7	10000		12.8662	15.2333	13.5367	0.995	0.435927	0.208789	0.9834	3.29287	0.503287	0.9885	1.87352	0.395128	0.9936	0.604768	0.234476
E43	13	9.7	11.7	10000		12.8662	15.2333	13.5367	0.9981	0.193324	0.146562	0.9963	2.9976	0.4998	0.9575	4.27499	0.623406	0.9948	0.563499	0.237381
E44	11	7.6	9.7	10000		12.8662	15.2333	13.5367	0.9972	0.119523	0.13067	0.9929	0.369808	0.192304	0.9841	0.775985	0.293633	0.9957	0.195178	0.156196
E45	15	12	12.8	10000		12.8662	15.2333	13.5367	0.9989	0.145503	0.115011	0.9983	0.697702	0.22324	0.9662	12.9131	0.996654	0.974	11.1992	0.966059
E46	9	6.5	7.7	10000		12.8662	15.2333	13.5367	0.999	0.0298413	0.0772545	0.998	0.0831697	0.101962	0.9685	1.19711	0.413541	0.9894	0.311782	0.227955
E47	15	15.1	14.5	10000		12.8662	15.2333	13.5367	0.9752	4.55398	0.643427	0.9751	4.71987	0.580632	0.9502	9.00573	0.832315	0.971	6.47268	0.734432
E48	13	11	11.8	10000		12.8662	15.2333	13.5367	0.9779	2.61541	0.539074	0.9764	3.62969	0.549976	0.9746	2.86685	0.510512	0.9766	3.93227	0.627078
E49	11	7.8	9.9	10000		12.8662	15.2333	13.5367	0.9954	0.17466	0.15796	0.9906	0.75884	0.27547	0.9526	2.74886	0.552656	0.9939	0.243002	0.174285
E50	13	8.4	11.5	10000		12.8662	15.2333	13.5367	0.9927	0.40173	0.211274	0.9854	1.97331	0.405515	0.9664	4.56583	0.644264	0.985	0.957862	0.309493
E51	13	10.3	11.8	10000		12.8662	15.2333	13.5367	0.9936	0.74115	0.286967	0.9912	3.64062	0.550804	0.9762	3.01052	0.523147	0.9966	0.427001	0.20664
		10.6541	12.4251								0.218865			0.410419			0.65298			0.366606
			0.0467					0.1351
			0.216102					0.36756							0.1754					0.0005	0.0223607
															0.418808			10	0.5
																		22	0.5
									R2	rss	SEE	R2	rss	SEE	R2	rss	SEE	R2	rss	SEE
									0.9364	0.0163427	0.0639194	0.9344	0.0831697	0.099867	0.9213	0.775985	0.293633	0.9396	0.0518801	0.056943
									0.9996	6.90408	0.830908	0.9987	35.6698	1.43246	0.9894	35.4059	1.44316	0.9991	16.8626	1.45183
									0.995496	0.656227	0.21583	0.992251	2.72878	0.396211	0.966428	5.6132	0.643476	0.989301	1.88728	0.368271
									R2	SEE	R2	SEE	R2	SEE	R2	SEE
									0.9364	0.0639194	0.9344	0.099867	0.9213	0.293633	0.9396	0.056943
									0.9996	0.830908	0.9987	1.43246	0.9894	1.44316	0.9991	1.45183
									0.995496	0.21583	0.992251	0.396211	0.966428	0.643476	0.989301	0.368271

## Sheet: Modelling Figure
h	d	D	H	h/H	sd	i1	i2	p	q	a1	a2	b	a	b1	b2	k1	k2	0	1	2	3		Brink	Pain1	Pain2	Sharma1	Sharma2	h	Pain1	Pain2	Sharma1	Sharma2
0.0001	12.2	10	13	7.69231e-06	1000	2.1504	-0.0306	-0.0282	0.9331	74.4301	-0.2365	-0.3227	9.5205	0.4008	3.8174	21.7021	2.0266	0.9964	2.0257	-0.031	0.1058	19.6487	10.6003	16.1797	22.8935	13.2505	13.0429	0.0001	7.24638e-06	14.7
1	9.7	10	13	0.0769231	1000	2.1504	-0.0306	-0.0282	0.9331	74.4301	-0.2365	-0.3227	9.5205	0.4008	3.8174	21.7021	2.0266	0.9964	2.0257	-0.031	0.1058	19.6487	10.1405	14.8823	12.4291	10.1918	10.1671	1	0.0724638	13.3
1.3	9.2	10	13	0.1	1000	2.1504	-0.0306	-0.0282	0.9331	74.4301	-0.2365	-0.3227	9.5205	0.4008	3.8174	21.7021	2.0266	0.9964	2.0257	-0.031	0.1058	19.6487	10	14.8376	12.126	10	9.98198	1.3	0.0942029	13
2	8.6	10	13	0.153846	1000	2.1504	-0.0306	-0.0282	0.9331	74.4301	-0.2365	-0.3227	9.5205	0.4008	3.8174	21.7021	2.0266	0.9964	2.0257	-0.031	0.1058	19.6487	9.66747	14.7389	11.6116	9.59589	9.58937	2	0.144928	12.7
3	8	10	13	0.230769	1000	2.1504	-0.0306	-0.0282	0.9331	74.4301	-0.2365	-0.3227	9.5205	0.4008	3.8174	21.7021	2.0266	0.9964	2.0257	-0.031	0.1058	19.6487	9.1808	14.5564	11.0688	9.06016	9.06077	3	0.217391	12.3
4	7.4	10	13	0.307692	1000	2.1504	-0.0306	-0.0282	0.9331	74.4301	-0.2365	-0.3227	9.5205	0.4008	3.8174	21.7021	2.0266	0.9964	2.0257	-0.031	0.1058	19.6487	8.67993	14.2714	10.5817	8.53571	8.53219	4	0.289855	11.5
5	6.7	10	13	0.384615	1000	2.1504	-0.0306	-0.0282	0.9331	74.4301	-0.2365	-0.3227	9.5205	0.4008	3.8174	21.7021	2.0266	0.9964	2.0257	-0.031	0.1058	19.6487	8.16401	13.8367	10.064	8.00429	7.98571	5	0.362319	10.9
6	6	10	13	0.461538	1000	2.1504	-0.0306	-0.0282	0.9331	74.4301	-0.2365	-0.3227	9.5205	0.4008	3.8174	21.7021	2.0266	0.9964	2.0257	-0.031	0.1058	19.6487	7.6315	13.2093	9.46258	7.45444	7.41104	6	0.434783	10
7	4.8	10	13	0.538462	1000	2.1504	-0.0306	-0.0282	0.9331	74.4301	-0.2365	-0.3227	9.5205	0.4008	3.8174	21.7021	2.0266	0.9964	2.0257	-0.031	0.1058	19.6487	7.07911	12.3478	8.73717	6.87582	6.8	7	0.507246	9.4
8	3.6	10	13	0.615385	1000	2.1504	-0.0306	-0.0282	0.9331	74.4301	-0.2365	-0.3227	9.5205	0.4008	3.8174	21.7021	2.0266	0.9964	2.0257	-0.031	0.1058	19.6487	6.49907	11.2115	7.85318	6.25653	6.14375	8	0.57971	8.6
9	1.9	10	13	0.692308	1000	2.1504	-0.0306	-0.0282	0.9331	74.4301	-0.2365	-0.3227	9.5205	0.4008	3.8174	21.7021	2.0266	0.9964	2.0257	-0.031	0.1058	19.6487	5.87235	9.75987	6.77906	5.58011	5.43016	9	0.652174	7.8
10		10	13	0.769231	1000	2.1504	-0.0306	-0.0282	0.9331	74.4301	-0.2365	-0.3227	9.5205	0.4008	3.8174	21.7021	2.0266	0.9964	2.0257	-0.031	0.1058	19.6487	5.15118	7.9529	5.48505	4.82024	4.63899	10	0.724638	7
11		10	13	0.846154	1000	2.1504	-0.0306	-0.0282	0.9331	74.4301	-0.2365	-0.3227	9.5205	0.4008	3.8174	21.7021	2.0266	0.9964	2.0257	-0.031	0.1058	19.6487	4.21482	5.75053	3.94245	3.92666	3.72946	11	0.797101	6.3
12		10	13	0.923077	1000	2.1504	-0.0306	-0.0282	0.9331	74.4301	-0.2365	-0.3227	9.5205	0.4008	3.8174	21.7021	2.0266	0.9964	2.0257	-0.031	0.1058	19.6487	2.75704	3.11286	2.12327	2.77074	2.59144	12	0.869565	4.7
13		10	13	1	1000	2.1504	-0.0306	-0.0282	0.9331	74.4301	-0.2365	-0.3227	9.5205	0.4008	3.8174	21.7021	2.0266	0.9964	2.0257	-0.031	0.1058	19.6487	3.55271e-15	0	0	0	0	13	0.942029	2.9
0.0001	10	10	13	7.69231e-06	2000	2.1504	-0.0306	-0.0282	0.9331	74.4301	-0.2365	-0.3227	9.5205	0.4008	3.8174	21.7021	2.0266	0.9964	2.0257	-0.031	0.1058	19.6487	10.607	13.9829	22.2765	12.5867	12.4499	0.0001	6.84932e-06	15.6
1	8.2	10	13	0.0769231	2000	2.1504	-0.0306	-0.0282	0.9331	74.4301	-0.2365	-0.3227	9.5205	0.4008	3.8174	21.7021	2.0266	0.9964	2.0257	-0.031	0.1058	19.6487	10.1421	12.6865	12.2947	10.1773	10.154	1	0.0684932	11.8
1.3	8	10	13	0.1	2000	2.1504	-0.0306	-0.0282	0.9331	74.4301	-0.2365	-0.3227	9.5205	0.4008	3.8174	21.7021	2.0266	0.9964	2.0257	-0.031	0.1058	19.6487	10	12.643	12.0053	10	9.98198	1.3	0.0890411	11.7
2	7.8	10	13	0.153846	2000	2.1504	-0.0306	-0.0282	0.9331	74.4301	-0.2365	-0.3227	9.5205	0.4008	3.8174	21.7021	2.0266	0.9964	2.0257	-0.031	0.1058	19.6487	9.66375	12.55	11.5135	9.61834	9.60968	2	0.136986	11.5
3	7.3	10	13	0.230769	2000	2.1504	-0.0306	-0.0282	0.9331	74.4301	-0.2365	-0.3227	9.5205	0.4008	3.8174	21.7021	2.0266	0.9964	2.0257	-0.031	0.1058	19.6487	9.17163	12.3866	10.992	9.10136	9.09806	3	0.205479	10.9
4	6.7	10	13	0.307692	2000	2.1504	-0.0306	-0.0282	0.9331	74.4301	-0.2365	-0.3227	9.5205	0.4008	3.8174	21.7021	2.0266	0.9964	2.0257	-0.031	0.1058	19.6487	8.66516	12.1385	10.52	8.58792	8.57943	4	0.273973	10.6
5	6.3	10	13	0.384615	2000	2.1504	-0.0306	-0.0282	0.9331	74.4301	-0.2365	-0.3227	9.5205	0.4008	3.8174	21.7021	2.0266	0.9964	2.0257	-0.031	0.1058	19.6487	8.14349	11.7648	10.0139	8.06301	8.03872	5	0.342466	9.8
6	5.5	10	13	0.461538	2000	2.1504	-0.0306	-0.0282	0.9331	74.4301	-0.2365	-0.3227	9.5205	0.4008	3.8174	21.7021	2.0266	0.9964	2.0257	-0.031	0.1058	19.6487	7.60512	11.2285	9.42207	7.51655	7.46693	6	0.410959	9.3
7	5	10	13	0.538462	2000	2.1504	-0.0306	-0.0282	0.9331	74.4301	-0.2365	-0.3227	9.5205	0.4008	3.8174	21.7021	2.0266	0.9964	2.0257	-0.031	0.1058	19.6487	7.04678	10.494	8.70473	6.93891	6.85647	7	0.479452	8.9
8	4.5	10	13	0.615385	2000	2.1504	-0.0306	-0.0282	0.9331	74.4301	-0.2365	-0.3227	9.5205	0.4008	3.8174	21.7021	2.0266	0.9964	2.0257	-0.031	0.1058	19.6487	6.46089	9.5266	7.82774	6.31851	6.19884	8	0.547945	8.3
9	3.5	10	13	0.692308	2000	2.1504	-0.0306	-0.0282	0.9331	74.4301	-0.2365	-0.3227	9.5205	0.4008	3.8174	21.7021	2.0266	0.9964	2.0257	-0.031	0.1058	19.6487	5.82877	8.29199	6.75979	5.639	5.48201	9	0.616438	7.7
10	2.5	10	13	0.769231	2000	2.1504	-0.0306	-0.0282	0.9331	74.4301	-0.2365	-0.3227	9.5205	0.4008	3.8174	21.7021	2.0266	0.9964	2.0257	-0.031	0.1058	19.6487	5.10365	6.75599	5.47131	4.87389	4.68571	10	0.684932	7.2
11	17.5	10	13	0.846154	2000	2.1504	-0.0306	-0.0282	0.9331	74.4301	-0.2365	-0.3227	9.5205	0.4008	3.8174	21.7021	2.0266	0.9964	2.0257	-0.031	0.1058	19.6487	4.16731	4.8846	3.9337	3.97242	3.76879	11	0.753425	5.9
12	15.6	10	13	0.923077	2000	2.1504	-0.0306	-0.0282	0.9331	74.4301	-0.2365	-0.3227	9.5205	0.4008	3.8174	21.7021	2.0266	0.9964	2.0257	-0.031	0.1058	19.6487	2.71994	2.6439	2.11908	2.80435	2.61988	12	0.821918	4.2
13	15.3	10	13	1	2000	2.1504	-0.0306	-0.0282	0.9331	74.4301	-0.2365	-0.3227	9.5205	0.4008	3.8174	21.7021	2.0266	0.9964	2.0257	-0.031	0.1058	19.6487	8.88178e-16	0	0	0	0	13	0.890411	2.2
0.0001	13	10	13	7.69231e-06	3000	2.1504	-0.0306	-0.0282	0.9331	74.4301	-0.2365	-0.3227	9.5205	0.4008	3.8174	21.7021	2.0266	0.9964	2.0257	-0.031	0.1058	19.6487	10.6109	12.8552	21.9155	12.3729	12.2583	0.0001	8.19672e-06	13
1	10.9	10	13	0.0769231	3000	2.1504	-0.0306	-0.0282	0.9331	74.4301	-0.2365	-0.3227	9.5205	0.4008	3.8174	21.7021	2.0266	0.9964	2.0257	-0.031	0.1058	19.6487	10.143	11.5593	12.2161	10.1724	10.1497	1	0.0819672	10.9
1.3	10.8	10	13	0.1	3000	2.1504	-0.0306	-0.0282	0.9331	74.4301	-0.2365	-0.3227	9.5205	0.4008	3.8174	21.7021	2.0266	0.9964	2.0257	-0.031	0.1058	19.6487	10	11.5164	11.9347	10	9.98198	1.3	0.106557	10.8
2	10.3	10	13	0.153846	3000	2.1504	-0.0306	-0.0282	0.9331	74.4301	-0.2365	-0.3227	9.5205	0.4008	3.8174	21.7021	2.0266	0.9964	2.0257	-0.031	0.1058	19.6487	9.66161	11.4265	11.4561	9.62584	9.61646	2	0.163934	10.3
3	9.8	10	13	0.230769	3000	2.1504	-0.0306	-0.0282	0.9331	74.4301	-0.2365	-0.3227	9.5205	0.4008	3.8174	21.7021	2.0266	0.9964	2.0257	-0.031	0.1058	19.6487	9.16635	11.2727	10.947	9.11514	9.11053	3	0.245902	9.8
4	9.3	10	13	0.307692	3000	2.1504	-0.0306	-0.0282	0.9331	74.4301	-0.2365	-0.3227	9.5205	0.4008	3.8174	21.7021	2.0266	0.9964	2.0257	-0.031	0.1058	19.6487	8.65666	11.0437	10.4838	8.6054	8.59523	4	0.327869	9.3
5	8.9	10	13	0.384615	3000	2.1504	-0.0306	-0.0282	0.9331	74.4301	-0.2365	-0.3227	9.5205	0.4008	3.8174	21.7021	2.0266	0.9964	2.0257	-0.031	0.1058	19.6487	8.13169	10.7013	9.98462	8.08268	8.05647	5	0.409836	8.9
6	8.4	10	13	0.461538	3000	2.1504	-0.0306	-0.0282	0.9331	74.4301	-0.2365	-0.3227	9.5205	0.4008	3.8174	21.7021	2.0266	0.9964	2.0257	-0.031	0.1058	19.6487	7.58994	10.2117	9.39837	7.53737	7.48565	6	0.491803	8.4
7	7.7	10	13	0.538462	3000	2.1504	-0.0306	-0.0282	0.9331	74.4301	-0.2365	-0.3227	9.5205	0.4008	3.8174	21.7021	2.0266	0.9964	2.0257	-0.031	0.1058	19.6487	7.02819	9.54236	8.68576	6.96007	6.8754	7	0.57377	7.7
8	6.8	10	13	0.615385	3000	2.1504	-0.0306	-0.0282	0.9331	74.4301	-0.2365	-0.3227	9.5205	0.4008	3.8174	21.7021	2.0266	0.9964	2.0257	-0.031	0.1058	19.6487	6.43892	8.66172	7.81285	6.33931	6.21731	8	0.655738	6.8
9	6.2	10	13	0.692308	3000	2.1504	-0.0306	-0.0282	0.9331	74.4301	-0.2365	-0.3227	9.5205	0.4008	3.8174	21.7021	2.0266	0.9964	2.0257	-0.031	0.1058	19.6487	5.8037	7.53849	6.74852	5.65877	5.49941	9	0.737705	6.2
10	4.9	10	13	0.769231	3000	2.1504	-0.0306	-0.0282	0.9331	74.4301	-0.2365	-0.3227	9.5205	0.4008	3.8174	21.7021	2.0266	0.9964	2.0257	-0.031	0.1058	19.6487	5.07631	6.1416	5.46326	4.89191	4.70139	10	0.819672	4.9
11	2.8	10	13	0.846154	3000	2.1504	-0.0306	-0.0282	0.9331	74.4301	-0.2365	-0.3227	9.5205	0.4008	3.8174	21.7021	2.0266	0.9964	2.0257	-0.031	0.1058	19.6487	4.13999	4.44011	3.92858	3.98779	3.78199	11	0.901639	2.8
12		10	13	0.923077	3000	2.1504	-0.0306	-0.0282	0.9331	74.4301	-0.2365	-0.3227	9.5205	0.4008	3.8174	21.7021	2.0266	0.9964	2.0257	-0.031	0.1058	19.6487	2.6986	2.40317	2.11662	2.81565	2.62943	11.8	0.967213	0
13	17.8	10	13	1	3000	2.1504	-0.0306	-0.0282	0.9331	74.4301	-0.2365	-0.3227	9.5205	0.4008	3.8174	21.7021	2.0266	0.9964	2.0257	-0.031	0.1058	19.6487	1.77636e-15	0	0	0	0	12.2	1
0.0001	14.9	10	13	7.69231e-06	4000	2.1504	-0.0306	-0.0282	0.9331	74.4301	-0.2365	-0.3227	9.5205	0.4008	3.8174	21.7021	2.0266	0.9964	2.0257	-0.031	0.1058	19.6487	10.6136	12.1182	21.6594	12.2674	12.1636	0.0001		11
1	14.4	10	13	0.0769231	4000	2.1504	-0.0306	-0.0282	0.9331	74.4301	-0.2365	-0.3227	9.5205	0.4008	3.8174	21.7021	2.0266	0.9964	2.0257	-0.031	0.1058	19.6487	10.1436	10.8226	12.1603	10.17	10.1475	1		9.7
1.3	13.5	10	13	0.1	4000	2.1504	-0.0306	-0.0282	0.9331	74.4301	-0.2365	-0.3227	9.5205	0.4008	3.8174	21.7021	2.0266	0.9964	2.0257	-0.031	0.1058	19.6487	10	10.7802	11.8847	10	9.98198	1.3		9.6
2	12.8	10	13	0.153846	4000	2.1504	-0.0306	-0.0282	0.9331	74.4301	-0.2365	-0.3227	9.5205	0.4008	3.8174	21.7021	2.0266	0.9964	2.0257	-0.031	0.1058	19.6487	9.6601	10.6922	11.4154	9.62959	9.61986	2		9.2
3	12.1	10	13	0.230769	4000	2.1504	-0.0306	-0.0282	0.9331	74.4301	-0.2365	-0.3227	9.5205	0.4008	3.8174	21.7021	2.0266	0.9964	2.0257	-0.031	0.1058	19.6487	9.16265	10.5448	10.9151	9.12203	9.11677	3		9.1
4	11.6	10	13	0.307692	4000	2.1504	-0.0306	-0.0282	0.9331	74.4301	-0.2365	-0.3227	9.5205	0.4008	3.8174	21.7021	2.0266	0.9964	2.0257	-0.031	0.1058	19.6487	8.65069	10.3282	10.4582	8.61415	8.60315	4		8.8
5	11	10	13	0.384615	4000	2.1504	-0.0306	-0.0282	0.9331	74.4301	-0.2365	-0.3227	9.5205	0.4008	3.8174	21.7021	2.0266	0.9964	2.0257	-0.031	0.1058	19.6487	8.12341	10.0063	9.96384	8.09253	8.06536	5		8.1
6	10.1	10	13	0.461538	4000	2.1504	-0.0306	-0.0282	0.9331	74.4301	-0.2365	-0.3227	9.5205	0.4008	3.8174	21.7021	2.0266	0.9964	2.0257	-0.031	0.1058	19.6487	7.57929	9.54714	9.38155	7.5478	7.49503	6		7.4
7	9.6	10	13	0.538462	4000	2.1504	-0.0306	-0.0282	0.9331	74.4301	-0.2365	-0.3227	9.5205	0.4008	3.8174	21.7021	2.0266	0.9964	2.0257	-0.031	0.1058	19.6487	7.01514	8.92042	8.6723	6.97068	6.88488	7		7
8	8.8	10	13	0.615385	4000	2.1504	-0.0306	-0.0282	0.9331	74.4301	-0.2365	-0.3227	9.5205	0.4008	3.8174	21.7021	2.0266	0.9964	2.0257	-0.031	0.1058	19.6487	6.4235	8.09648	7.8023	6.34974	6.22656	8		6
9	8.3	10	13	0.692308	4000	2.1504	-0.0306	-0.0282	0.9331	74.4301	-0.2365	-0.3227	9.5205	0.4008	3.8174	21.7021	2.0266	0.9964	2.0257	-0.031	0.1058	19.6487	5.7861	7.04605	6.74053	5.66867	5.50813	9		5.4
10	6.9	10	13	0.769231	4000	2.1504	-0.0306	-0.0282	0.9331	74.4301	-0.2365	-0.3227	9.5205	0.4008	3.8174	21.7021	2.0266	0.9964	2.0257	-0.031	0.1058	19.6487	5.05712	5.74006	5.45756	4.90094	4.70925	10		4.6
11	5.3	10	13	0.846154	4000	2.1504	-0.0306	-0.0282	0.9331	74.4301	-0.2365	-0.3227	9.5205	0.4008	3.8174	21.7021	2.0266	0.9964	2.0257	-0.031	0.1058	19.6487	4.12081	4.1496	3.92495	3.9955	3.78861	11		3.3
12	3.9	10	13	0.923077	4000	2.1504	-0.0306	-0.0282	0.9331	74.4301	-0.2365	-0.3227	9.5205	0.4008	3.8174	21.7021	2.0266	0.9964	2.0257	-0.031	0.1058	19.6487	2.68362	2.24584	2.11488	2.82131	2.63422	12		2.1
13	2	10	13	1	4000	2.1504	-0.0306	-0.0282	0.9331	74.4301	-0.2365	-0.3227	9.5205	0.4008	3.8174	21.7021	2.0266	0.9964	2.0257	-0.031	0.1058	19.6487	-4.44089e-16	0	0	0	0	12.7		0

## Sheet: Parameter prediction
Approx															3333	2.1568	0.00113	0.64	10.9029	-0.3936	2.0324	0.9976	2.028	-0.00152	0.1625
Parameter Estimate Std Error Approximate 95% Confidence Limits															5000	1.5143	-0.0436	1.2003	9.8123	-0.3403	2.0319	0.9893	2.0326	-0.037	0.0557
															6667	1.6975	-0.0243	0.8462	9.1655	-0.312	2.0303	0.9998	2.0293	-0.0712	0.1561
i 2.1568 0.1928 1.7778 2.5358															10000	1.4346	-0.0392	1.1461	8.6951	-0.2732	2.0278	0.9973	2.0273	-0.0292	0.0741
p 0.00113 0.00944 -0.0174 0.0197															3333
q 0.6400 0.0781 0.4865 0.7936															5000
		0.9763				2.1568	0.1928	0.00113	0.00944	0.64	0.0781	0.9763			6667
															10000
															3333
Approx															5000
Parameter Estimate Std Error Approximate 95% Confidence Limits															6667
															10000
i 1.5143 0.1079 1.3025 1.7261															3333
p -0.0436 0.00687 -0.0571 -0.0301															5000
q 1.2003 0.1722 0.8622 1.5385															6667
	c	0.9544				1.5143	0.1079	-0.0436	0.00687	1.2003	0.1722	0.9544			10000
Approx
Parameter Estimate Std Error Approximate 95% Confidence Limits
i 1.6975 0.1371 1.4283 1.9668
p -0.0243 0.00970 -0.0433 -0.00522
q 0.8462 0.0963 0.6573 1.0352
	d	0.9656				1.6975	0.1371	-0.0243	0.0097	0.8462	0.0963	0.9656
Approx
Parameter Estimate Std Error Approximate 95% Confidence Limits
i 1.4346 0.0984 1.2414 1.6278
p -0.0392 0.00784 -0.0546 -0.0238
q 1.1461 0.1409 0.8694 1.4229
	e	0.9638				1.4346	0.0984	-0.0392	0.00784	1.1461	0.1409	0.9638
Pain
Approx
Parameter Estimate Std Error Approximate 95% Confidence Limits
a 10.9029 0.1384 10.6310 11.1748
b -0.3936 0.0347 -0.4619 -0.3254
	b	0.7746				10.9029	0.1384	-0.3936	0.0347	0.7746
Approx
Parameter Estimate Std Error Approximate 95% Confidence Limits
a 9.8123 0.1190 9.5787 10.0460
b -0.3403 0.0295 -0.3981 -0.2824
						9.8123	0.119	-0.3403	0.0295	0.6888
	c	0.6888
Approx
Parameter Estimate Std Error Approximate 95% Confidence Limits
a 9.1655 0.0915 8.9859 9.3452
b -0.3120 0.0223 -0.3557 -0.2683
	d	0.7588				9.1655	0.0915	-0.312	0.0223	0.7588
Approx
Parameter Estimate Std Error Approximate 95% Confidence Limits
a 8.6951 0.1007 8.4973 8.8929
b -0.2732 0.0244 -0.3212 -0.2253
	e	0.6966				8.6951	0.1007	-0.2732	0.0244	0.6966
Sharma
Approx
Parameter Estimate Std Error Approximate 95% Confidence Limits
k 2.0324 0.00145 2.0296 2.0353
	b	0.9815				2.0324	0.00145	0.9815
Approx
Parameter Estimate Std Error Approximate 95% Confidence Limits
k 2.0319 0.00131 2.0294 2.0345
	c	0.9714				2.0319	0.00131	0.9714
Approx
Parameter Estimate Std Error Approximate 95% Confidence Limits
k 2.0303 0.000990 2.0284 2.0322
	d	0.981				2.0303	0.00099	0.981
Approx
Parameter Estimate Std Error Approximate 95% Confidence Limits
k 2.0278 0.00114 2.0255 2.0300
	e	0.9766				2.0278	0.00114	0.9766
Sharma2
Approx
Parameter Estimate Std Error Approximate 95% Confidence Limits
a0 0.9976 0.00769 0.9825 1.0128
a1 2.0280 0.00149 2.0250 2.0309
a2 -0.00152 0.0396 -0.0794 0.0764
a3 0.1625 0.0509 0.0624 0.2626
	b	0.9849				0.9976	0.00769	2.028	0.00149	-0.00152	0.0396	0.1625	0.0509	0.9849
Approx
Parameter Estimate Std Error Approximate 95% Confidence Limits
a0 0.9893 0.00853 0.9725 1.0060
a1 2.0326 0.00163 2.0294 2.0358
a2 -0.0370 0.0436 -0.1227 0.0486
a3 0.0557 0.0551 -0.0524 0.1639
	c	0.9714				0.9893	0.00853	2.0326	0.00163	-0.037	0.0436	0.0557	0.0551	0.9714
Approx
Parameter Estimate Std Error Approximate 95% Confidence Limits
a0 0.9998 0.00638 0.9872 1.0123
a1 2.0293 0.00120 2.0270 2.0317
a2 -0.0712 0.0347 -0.1394 -0.00304
a3 0.1561 0.0443 0.0690 0.2431
	d	0.9819				0.9998	0.00638	2.0293	0.0012	-0.0712	0.0347	0.1561	0.0443	0.9819
Approx
Parameter Estimate Std Error Approximate 95% Confidence Limits
a0 0.9973 0.00743 0.9827 1.0119
a1 2.0273 0.00141 2.0245 2.0300
a2 -0.0292 0.0403 -0.1085 0.0500
a3 0.0741 0.0513 -0.0267 0.1749
	e	0.9771				0.9973	0.00743	2.0273	0.00141	-0.0292	0.0403	0.0741	0.0513	0.9771
				3333	2.1568	0.1928	0.00113	0.00944	0.64	0.0781	0.9763
				5000	1.5143	0.1079	-0.0436	0.00687	1.2003	0.1722	0.9544
				6667	1.6975	0.1371	-0.0243	0.0097	0.8462	0.0963	0.9656
				10000	1.4346	0.0984	-0.0392	0.00784	1.1461	0.1409	0.9638
				3333	10.9029	0.1384	-0.3936	0.0347	0.7746
				5000	9.8123	0.119	-0.3403	0.0295	0.6888
				6667	9.1655	0.0915	-0.312	0.0223	0.7588
				10000	8.6951	0.1007	-0.2732	0.0244	0.6966
				3333	2.0324	0.00145	0.9815
				5000	2.0319	0.00131	0.9714
				6667	2.0303	0.00099	0.981
				10000	2.0278	0.00114	0.9766
				3333	0.9976	0.00769	2.028	0.00149	-0.00152	0.0396	0.1625	0.0509	0.9849
				5000	0.9893	0.00853	2.0326	0.00163	-0.037	0.0436	0.0557	0.0551	0.9714
				6667	0.9998	0.00638	2.0293	0.0012	-0.0712	0.0347	0.1561	0.0443	0.9819
				10000	0.9973	0.00743	2.0273	0.00141	-0.0292	0.0403	0.0741	0.0513	0.9771
				0.00030003	0.0002	0.000149993	0.0001
				3333	5000	6667	10000			3333	5000	6667	10000
			Eq.(4)	2.1568	1.5143	1.6975	1.4346		Eq.(4)	2.1568(0.1928)	1.5143(0.1079)	1.6975(0.1371)	1.4346(0.0984)
				0.1928	0.1079	0.1371	0.0984			0.1928	0.1079	0.1371	0.0984
				0.00113	-0.0436	-0.0243	-0.0392			0.00113(0.00944)	-0.0436	-0.0243	-0.0392
				0.00944	0.00687	0.0097	0.00784			0.00944	0.00687	0.0097	0.00784
				0.64	1.2003	0.8462	1.1461			0.64	1.2003	0.8462	1.1461
				0.0781	0.1722	0.0963	0.1409			0.0781	0.1722	0.0963	0.1409
				0.9763	0.9544	0.9656	0.9638			0.9763	0.9544	0.9656	0.9638
			Eq.(5)	10.9029	9.8123	9.1655	8.6951		Eq.(5)	10.9029	9.8123	9.1655	8.6951
				0.1384	0.119	0.0915	0.1007			0.1384	0.119	0.0915	0.1007
				-0.3936	-0.3403	-0.312	-0.2732			-0.3936	-0.3403	-0.312	-0.2732
				0.0347	0.0295	0.0223	0.0244			0.0347	0.0295	0.0223	0.0244
				0.7746	0.6888	0.7588	0.6966			0.7746	0.6888	0.7588	0.6966
			Eq.(6)	2.0324	2.0319	2.0303	2.0278		Eq.(6)	2.0324	2.0319	2.0303	2.0278
				0.00145	0.00131	0.00099	0.00114			0.00145	0.00131	0.00099	0.00114
				0.9815	0.9714	0.981	0.9766			0.9815	0.9714	0.981	0.9766
			Eq.(8)	0.9976	0.9893	0.9998	0.9973		Eq.(8)	0.9976	0.9893	0.9998	0.9973
				0.00769	0.00853	0.00638	0.00743			0.00769	0.00853	0.00638	0.00743
				2.028	2.0326	2.0293	2.0273			2.028	2.0326	2.0293	2.0273
				0.00149	0.00163	0.0012	0.00141			0.00149	0.00163	0.0012	0.00141
				-0.00152	-0.037	-0.0712	-0.0292			-0.00152	-0.037	-0.0712	-0.0292
				0.0396	0.0436	0.0347	0.0403			0.0396	0.0436	0.0347	0.0403
				0.1625	0.0557	0.1561	0.0741			0.1625	0.0557	0.1561	0.0741
				0.0509	0.0551	0.0443	0.0513			0.0509	0.0551	0.0443	0.0513
				0.9849	0.9714	0.9819	0.9771			0.9849	0.9714	0.9819	0.9771
													0.987168
									0.824621
									y = 27.269x^(-0.3218)				y = 58.187x^(-0.2079)
													0.989848
									0.996293
							y = 0.1089Ln(x) - 1.2726					y = -7E-07x + 2.0351
								i1	2.1504	0.5675
								i2	-0.0306	0.0292
								p	-0.0282	0.00399
								q	0.9331	0.0575
									0.6625	0.965
						Approx
						Parameter Estimate Std Error Approximate 95% Confidence Limits
					Brink	i1 2.1504 0.5675 1.0376 3.2632
						i2 -0.0306 0.0292 -0.0878 0.0267
						p -0.0282 0.00399 -0.0360 -0.0203
						q 0.9331 0.0575 0.8203 1.0459
								Root MSE 0.66247 R-Square 0.9650
									74.4301	7.8224
									-0.2365	0.0122
					Approx				-0.3227	0.0136
					Parameter Estimate Std Error Approximate 95% Confidence Limits
					Pain
					a1 74.4301 7.8224 59.0908 89.7693
					a2 -0.2365 0.0122 -0.2603 -0.2126
					b -0.3227 0.0136 -0.3493 -0.2961
								Root MSE 1.82347 R-Square 0.7347
										1.8235	0.7347
					Approx
					Parameter Estimate Std Error Approximate 95% Confidence Limits
					Pain	b
					a 9.5205 0.0572 9.4084 9.6326
					a1 0.4008 0.0297 0.3426 0.4591
					a2 3.8174 0.2595 3.3085 4.3264
								Root MSE 1.88694 R-Square 0.7159
									9.5205	0.0572
									0.4008	0.0297
									3.8174	0.2595
					Approx				1.88694	0.7159
					Parameter Estimate Std Error Approximate 95% Confidence Limits
					Sharma
					k2 2.0352 0.00170 2.0319 2.0385
								Root MSE 0.53281 R-Square 0.9773
					Approx
					Parameter Estimate Std Error Approximate 95% Confidence Limits
					Sharma2
					a0 0.9964 0.00387 0.9888 1.0039
					a1 2.0257 0.00173 2.0224 2.0291
					a2 -0.0310 0.0204 -0.0709 0.00892
					a3 0.1058 0.0259 0.0550 0.1567
					a4 19.6487 8.3747 3.2263 36.0710
								Root MSE 0.52195 R-Square 0.9782
									0.9964	0.00387
									2.0257	0.00173
									-0.031	0.0204
									0.1058	0.0259
									19.6487	8.3747
					Approx				0.522	0.9782
					Parameter Estimate Std Error Approximate 95% Confidence Limits
					Sharma
					k1 -7.31E-7 2.576E-7 -1.24E-6 -2.26E-7
					k2 2.0352 0.00170 2.0319 2.0385
								Root MSE 0.53281 R-Square 0.9773
									-7.31e-07	2.576e-07
									2.0352	0.0017
									0.5328	0.9773
								i1	2.1504	0.5675	0.6625	0.965
								i2	-0.0306	0.0292
								p	-0.0282	0.00399
				0.6625	0.813941			q	0.9331	0.0575
								a1	74.4301	7.8224	1.8235	0.7347
								a2	-0.2365	0.0122
								b	-0.3227	0.0136
				1.8235	1.35037
								a	9.5205	0.0572	1.88694	0.7159
								b1	0.4008	0.0297
								b2	3.8174	0.2595
				1.8869	1.37364
								a0	0.9964	0.00387	0.522	0.9782
								a1	2.0257	0.00173
								a2	-0.031	0.0204
				0.5328	0.729932			a3	0.1058	0.0259
								a4	19.6487	8.3747
				0.522	0.722496			k1	-7.31e-07	2.576e-07	0.5328	0.9773
								k2	2.0352	0.0017
					i1	i2	p	q		a1	a2	b		a	b1	b2		a0	a1	a2	a3	a4		k1	k2
					2.1504	-0.0306	-0.0282	0.9331		74.4301	-0.2365	-0.3227		9.5205	0.4008	3.8174		0.9964	2.0257	-0.031	0.1058	19.6487		-7.31e-07	2.0352
					Approx
					Parameter Estimate Std Error Approximate 95% Confidence Limits
					k1 21.7021 8.5436 4.9487 38.4555
					k2 2.0266 0.00171 2.0233 2.0300
								Root MSE 0.53298 R-Square 0.9773
										0.730055
									21.7021	8.5436
									2.0266	0.00171
									21.7021	2.0266
									8.5436	0.00171
									0.6625	0.813941
									1.8235	1.35037
									1.88694	1.37366
									0.522	0.722496
									0.5328	0.729932
					Approx
					Parameter Estimate Std Error Approximate 95% Confidence Limits
				1.6318	i 1.6318 0.0600 1.5142 1.7495
				-0.0294	p -0.0294 0.00380 -0.0369 -0.0220
				0.9428	q 0.9428 0.0579 0.8293 1.0564
				0.66278				Root MSE 0.66278 R-Square 0.9650
				0.965	Approx
					Parameter Estimate Std Error Approximate 95% Confidence Limits
				9.5276	a 9.5276 0.0592 9.4116 9.6437
				-0.3199	b -0.3199 0.0145 -0.3484 -0.2914
				1.95403				Root MSE 1.95403 R-Square 0.6953
				0.6953
					Approx
					Parameter Estimate Std Error Approximate 95% Confidence Limits
				2.0307
				0.53359	k 2.0307 0.000607 2.0295 2.0319
				0.9772				Root MSE 0.53359 R-Square 0.9772
					Approx
					Parameter Estimate Std Error Approximate 95% Confidence Limits
				0.9964	a0 0.9964 0.00387 0.9888 1.0040
				2.0294	a1 2.0294 0.000737 2.0280 2.0308
				-0.0302	a2 -0.0302 0.0204 -0.0701 0.00975
				0.1051	a3 0.1051 0.0259 0.0542 0.1560
				0.52252				Root MSE 0.52252 R-Square 0.9782
				0.9782
				1.6318	9.5276	2.0307	0.9964
				-0.0294	-0.3199	0.53359	2.0294
				0.9428	1.95403	0.9772	-0.0302
				0.66278	0.6953		0.1051
				0.965			0.52252
							0.9782
				1.6318	-0.0294	0.9428	0.66278	0.965
				9.5276	-0.3199	1.95403	0.6953
				2.0307	0.53359	0.9772
				0.9964	2.0294	-0.0302	0.1051	0.52252	0.9782
				0.965		0.66278	0.814113
				0.6953		1.95403	1.39787
				0.9772		0.53359	0.730472
				0.9782		0.52252	0.722855
